# Supplementary material for: Carbon dots anchored on octahedral CoO as a stable visible-light-responsive composite photocatalyst for overall water splitting
Source: Royal Society of Chemistry journal article supplement (doi:10.1039/c7ta06077g), 2017-01-01
Supplement: c7ta06077g1.pdf [file c7ta06077g1.pdf]

## Carbon dots anchored on octahedral CoO as a stable visible-light-responsive composite photocatalyst for overall water splitting

### Supporting Information

#### 1. Apparent quantum efficiency (AQE) calculations.

In the photocatalytic water splitting, the catalyst solution was irradiated by a 300W Xe lamp (XD-300, China) with  $420 \pm 20$  nm band-pass filter for 24 h. The light source possesses a focused intensity of about  $2.80 \text{ mW/cm}^2$  (the irradiation intensity was determined by CEL-NP2000 spectroradiometer, Fig. S9) and the irradiation area is  $4.27 \text{ cm}^2$ . The number of incident photons (N) was calculated to be  $2.18 \times 10^{21}$  by Equation S1.<sup>S1</sup> The amount of  $\text{H}_2$  produced in 24 h for 5% CDs/CoO as photocatalysts was  $19.23 \text{ }\mu\text{mol}$ . The apparent quantum efficiency (AQE) of 5% CDs/ CoO was 1.02% as calculated by Equation S2.

$$N = \frac{E\lambda}{hc} = \frac{2.80 \times 10^{-3} \times 4.27 \times 24 \times 3600 \times 420 \times 10^{-9}}{6.626 \times 10^{-34} \times 3 \times 10^8} = 2.18 \times 10^{21}$$

Equation S1

$$AQE = \frac{2 \times \text{the number of evolved } \text{H}_2 \text{ molecules}}{\text{the number of incident photons}} \times 100\%$$

Equation S2

$$= \frac{2 \times 19.23 \times 10^{-6} \times 6.02 \times 10^{23}}{2.18 \times 10^{21}} \times 100\% = 1.02\%$$

#### 2. Turnover number (TON) calculations.

Here is our current condition: We have 10 mg catalyst in 20 mL water. Converting this to moles, 10 mg of 5% CDs/CoO (since 5 wt.% by weight is CDs we have 9.5 mg of CoO). Take this and convert to micromoles to further calculate the TON.

$$9.5 \text{ mg CoO} \times (1 \text{ g}/1000 \text{ mg}) \times (1 \text{ mol CoO}/75 \text{ g CoO}) \times (10^6 \text{ }\mu\text{mol}/1\text{mol}) = 127 \text{ }\mu\text{mol CoO}$$

Consequently, our TON would be  $>1$  if the catalyst produced  $63.5 \text{ }\mu\text{mol}$  of  $\text{O}_2$ . From the cumulative production experiment (Fig.S6b), the total amount of gaseous  $\text{O}_2$  collected reached  $216 \text{ }\mu\text{mol}$  after 10 days. It can be therefore estimated that TON is approximately 3.4.

#### 3. Additional Figures.

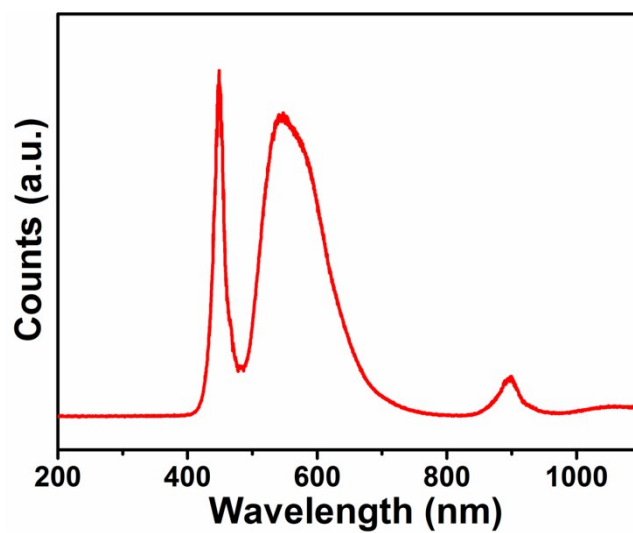

Fig.S1. The spectrum of the LED light source used for irradiation

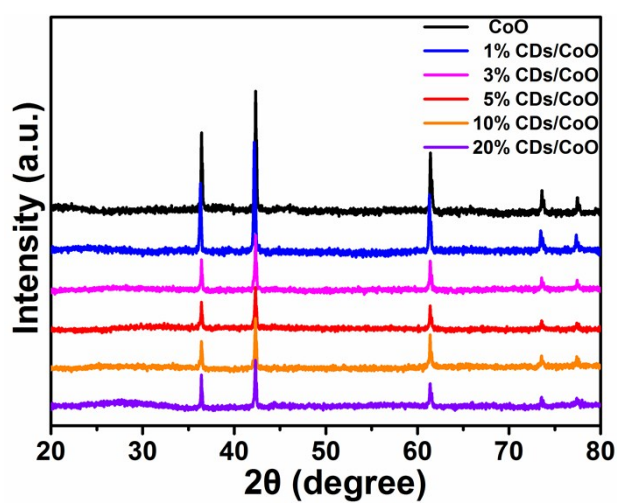

Fig.S2. XRD patterns of as-prepared samples.

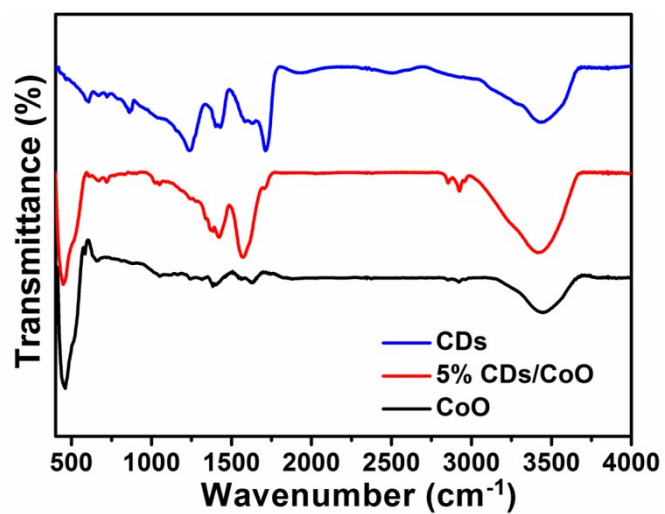

Fig.S3. FT-IR spectra of CDs, CoO and 5% CDs/CoO.

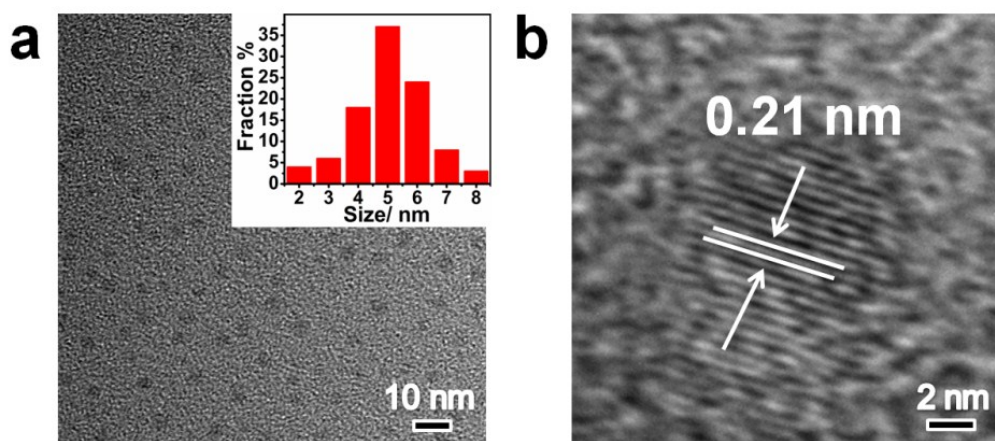

**Fig.S4.** (a) TEM (inset is size distribution of CDs) and (b) HRTEM images of CDs.

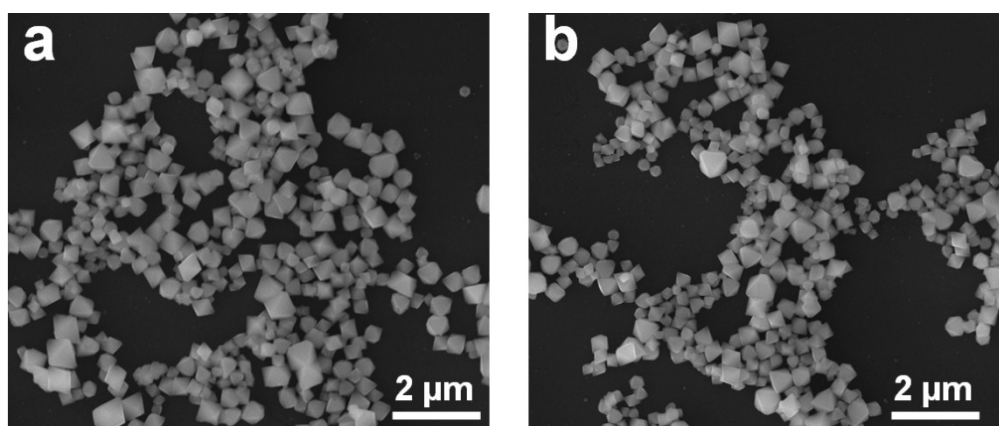

**Fig.S5.** SEM images of (a) octahedral CoO and 5% CDs/CoO composite.

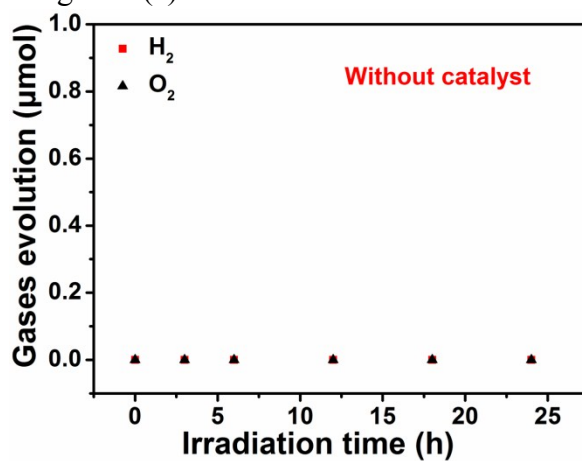

**Fig.S6.** The H<sub>2</sub>/O<sub>2</sub> evolutions from pure water without any catalysts under visible light irradiation ( $\lambda > 400$  nm).

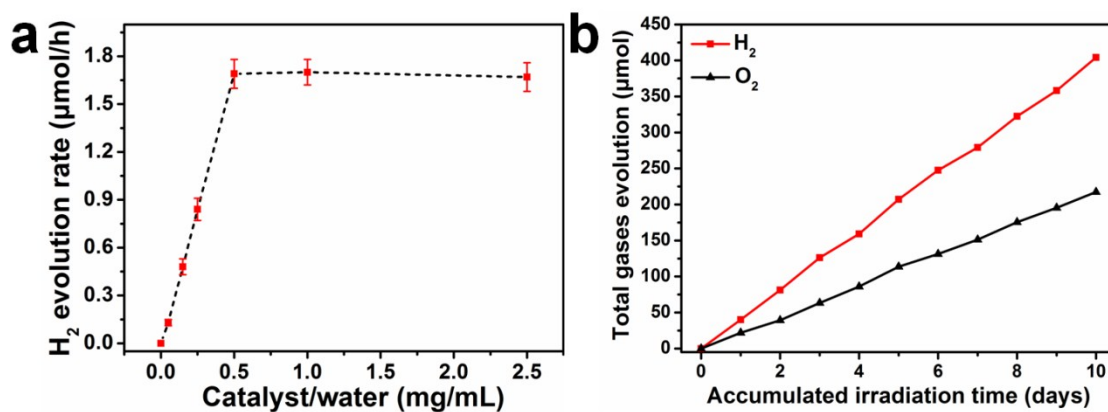

**Fig.S7.** (a) H<sub>2</sub> evolution rates for adding different amounts of catalyst in 20 mL of pure water. (b) The total H<sub>2</sub>/O<sub>2</sub> production from pure water with 5% CDs/CoO composite (10 mg, 20 mL pure water) under different accumulated irradiation time.

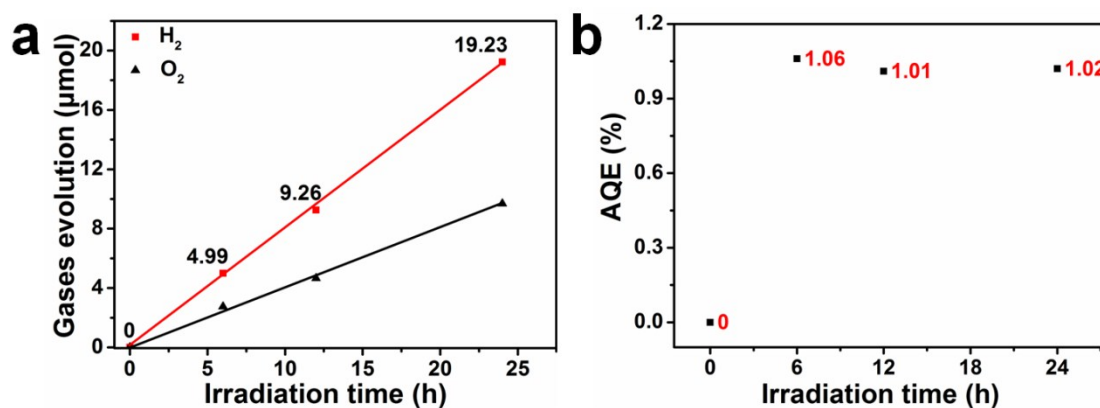

**Fig.S8.** (a) The H<sub>2</sub>/O<sub>2</sub> evolutions from pure water over 5% CDs/CoO under visible light irradiation ( $420 \pm 20$  nm,  $2.80$  mW/cm<sup>2</sup>). (b) The AQE of 5% CDs/CoO under different irradiation time.

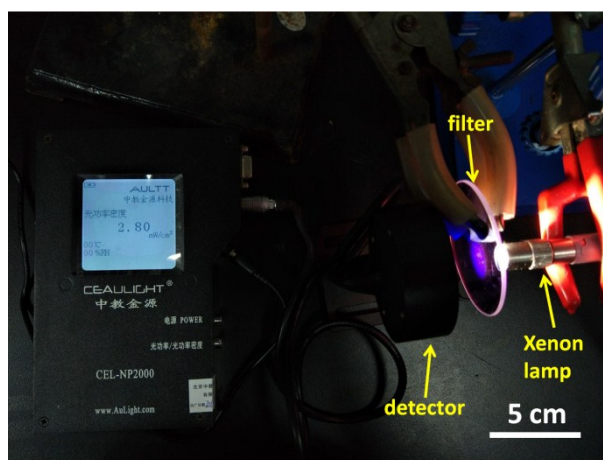

**Fig.S9.** The light power measurement of Xenon lamp (300 W) with a 420 nm band-pass filter. Irradiance intensity was determined as  $2.80$  mW cm<sup>-2</sup>.

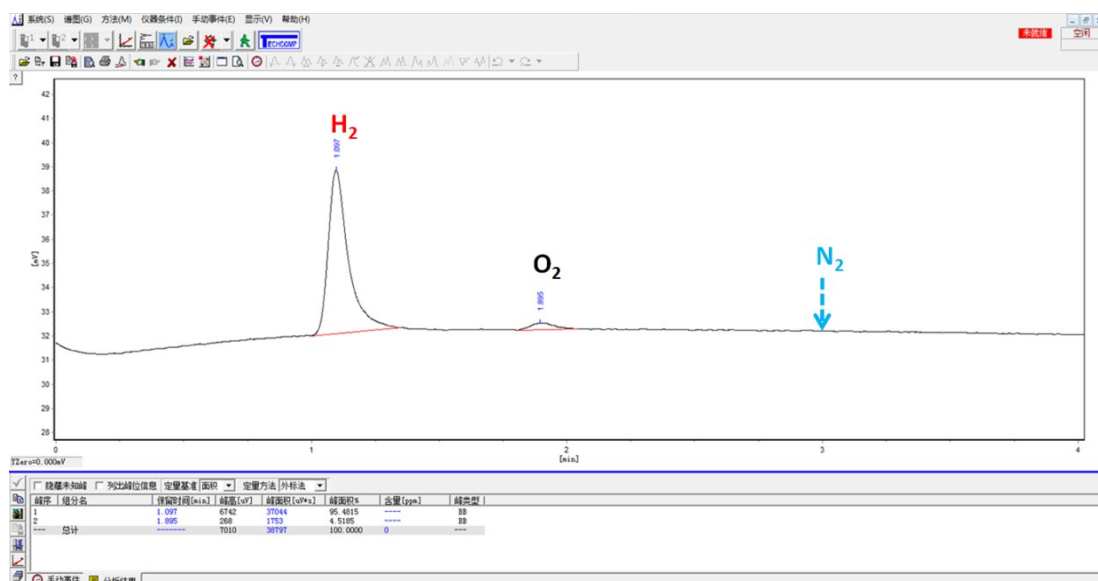

**Fig.S10.** A typical GC trace of evolved hydrogen and oxygen.

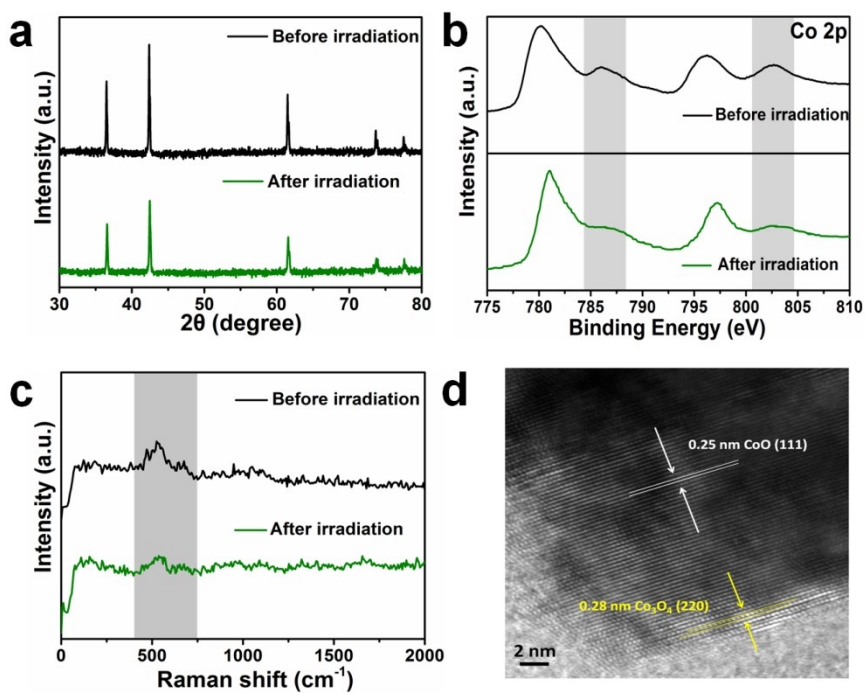

**Fig. S11.** (a) XRD patterns, (b) high-resolution Co 2p spectra and (c) Raman spectra of CoO before and after irradiation. (d) HRTEM image of CoO after irradiation.

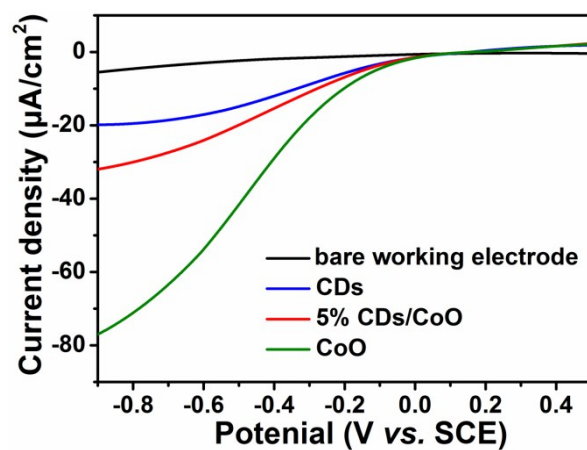

**Fig.S12.** LSV curves for CDs, 5% CDs/CoO, CoO, and the bare working electrode in 20 mM  $\text{H}_2\text{O}_2$  solution.

**Table S1.** A summary of the photocatalytic-hydrogen-production apparent quantum efficiency (AQE) of representative CD-based photocatalysts.

| Photocatalyst                        | Co-catalyst   | Sacrificial agents             | AQE (%)<br>at 420nm | Ref.      |
|--------------------------------------|---------------|--------------------------------|---------------------|-----------|
| CDs/CNNS                             | No            | Methanol (20 vol%)<br>solution | 0.136%              | Ref.S2    |
| CDs/ZnIn <sub>2</sub> S <sub>4</sub> | Pt (0.3 wt.%) | TEOA (10 vol%)<br>solution     | 0.2%                | Ref.S3    |
| CDs/BiVO <sub>4</sub> QDs            | No            | No                             | 0.63%               | Ref.S4    |
| CDs/CoO                              | No            | No                             | 1.02%               | This work |

#### References

- S1. J. Liu, Y. Liu, N. Liu, Y. Han, X. Zhang, H. Huang, Y. Lifshitz, S. T. Lee, J. Zhong and Z. Kang, *Science*, 2015, **347**, 970-974.
- S2. X. Y Xia, N. Deng, G. W. Cui, J. F. Xie, X. F. Shi, Y. Q. Zhao, Q. Wang, W. Wang and B. Tang, *Chem. Commun.* 2015, **51**, 10899-10902.
- S3. Q. Li, C. Cui, H. Meng, and J. G. Yu, *Chem. Asian J.* 2014, **9**, 1766–1770.
- S4. X. Q. Wu, J. Zhao, S. J. Guo, L. P. Wang, W. L. Shi, H. Huang, Y. Liu and Z. H. Kang, *Nanoscale* 2016, **8**, 17314-17321.
